# Supplementary material for: Abnormal sleep physiology in children with 15q11.2-13.1 duplication (Dup15q) syndrome
Source: PubMed Central journal article supplement (PMC8336244; doi:10.1186/s13229-021-00460-8), 2021-08-03

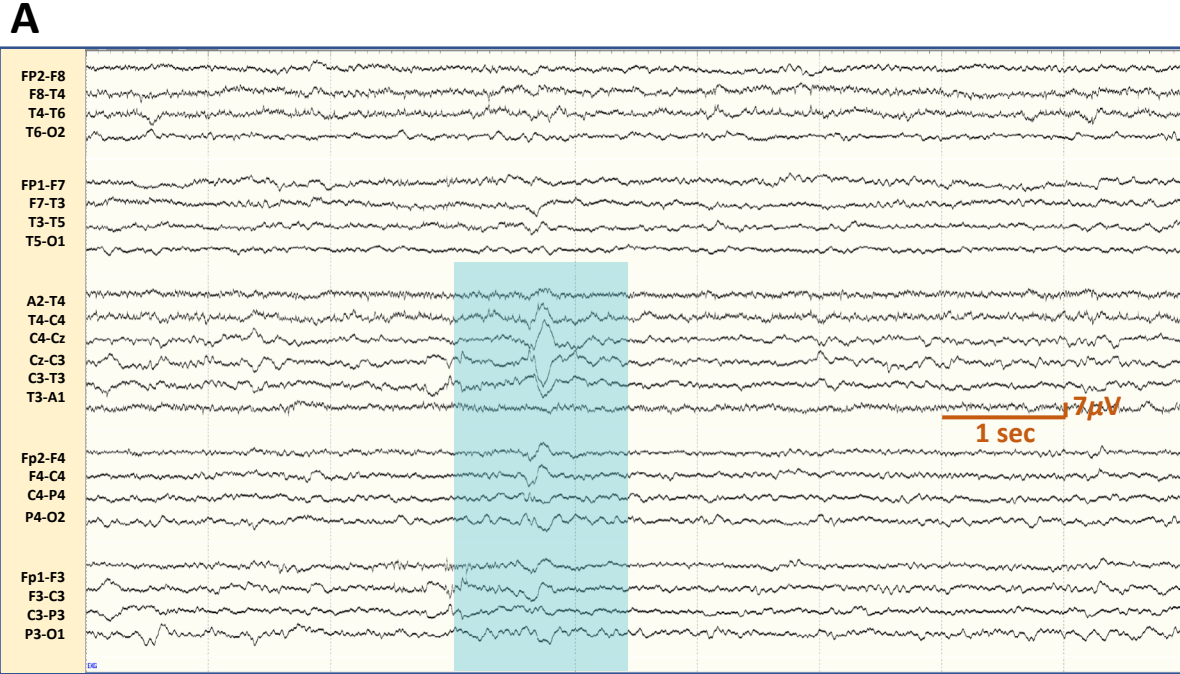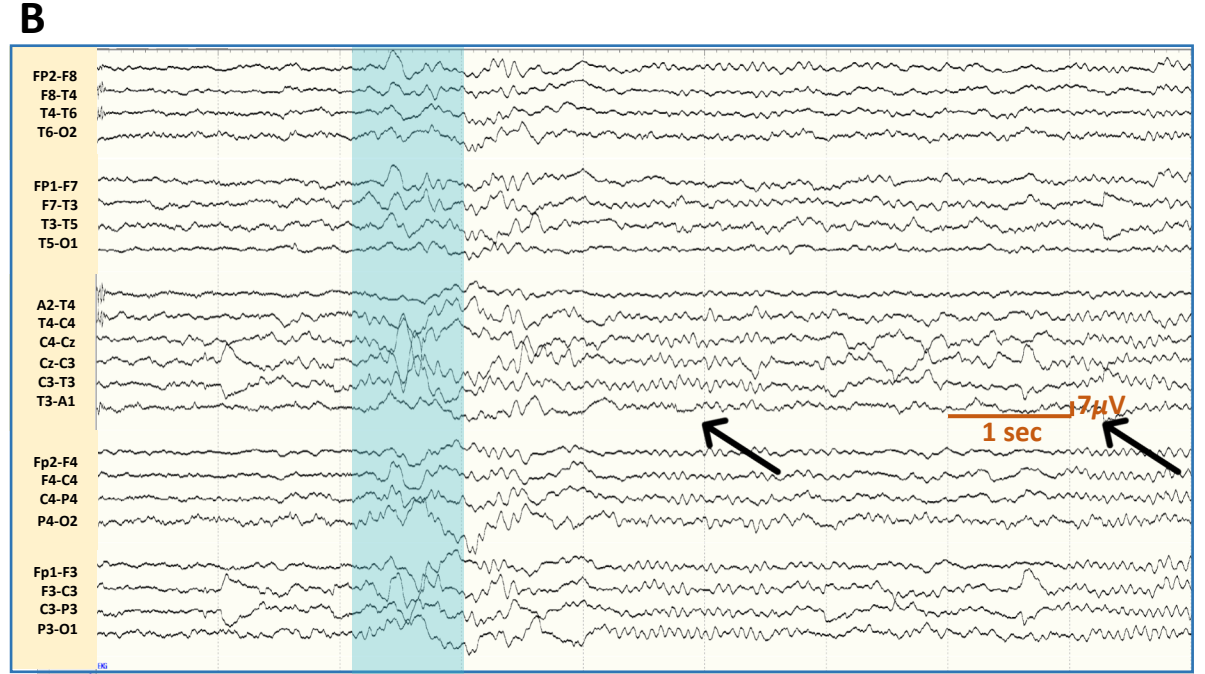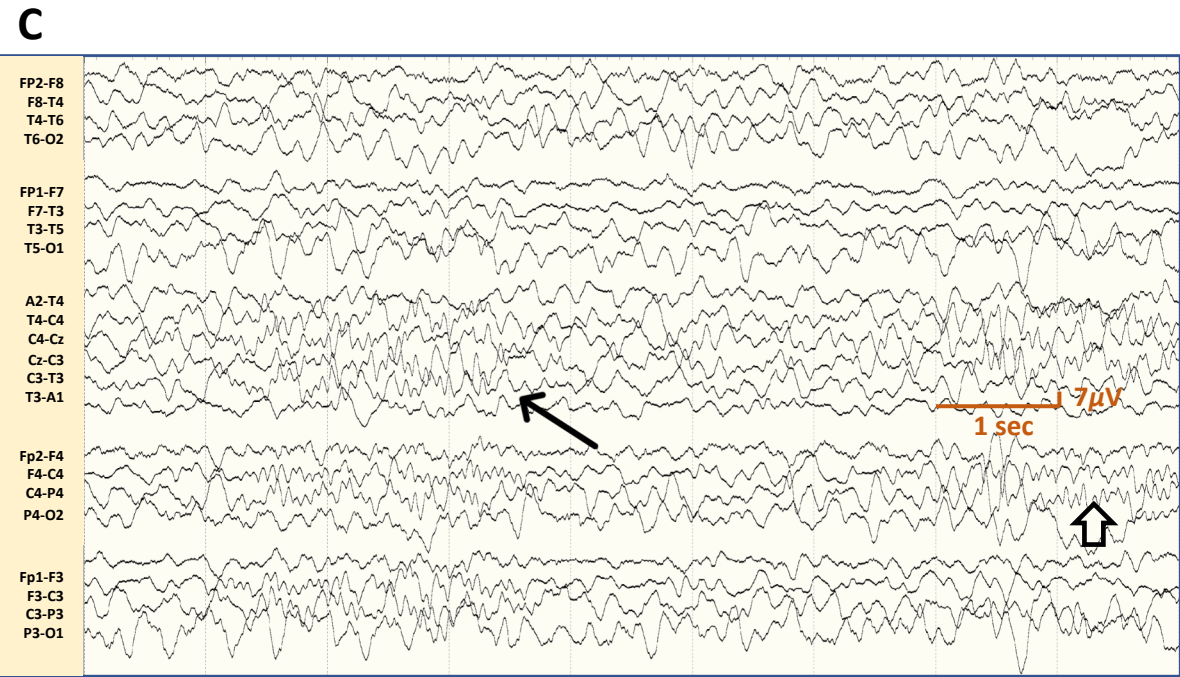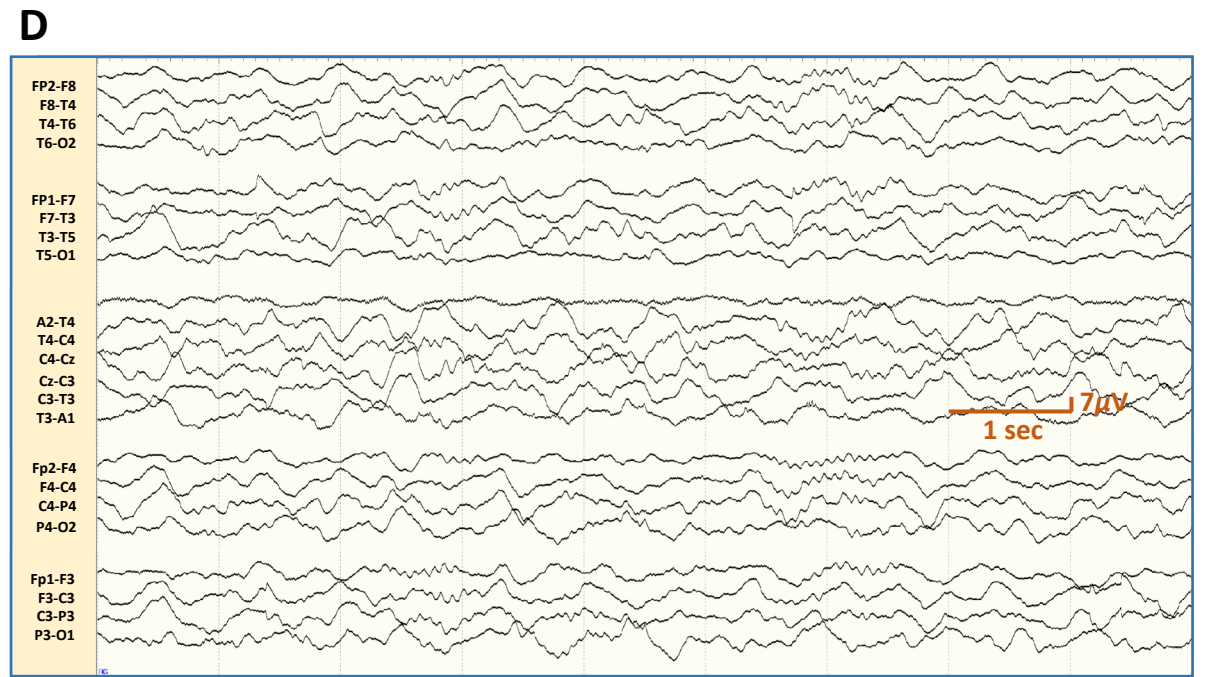

Supplement: 13229_2021_460_MOESM2_ESM.pdf [file 13229_2021_460_MOESM2_ESM.pdf]
